# Supplementary material for: IL-13 induces loss of CFTR in ionocytes and reduces airway epithelial fluid absorption
Source: PubMed Central journal article supplement (PMC11527443; doi:10.1172/jci181995), 2024-09-10
Supplement: jci-134-181995-s139.pdf [file jci-134-181995-s139.pdf]

SUPPLEMENTAL DATA

SUPPLEMENTAL FIGURE 1

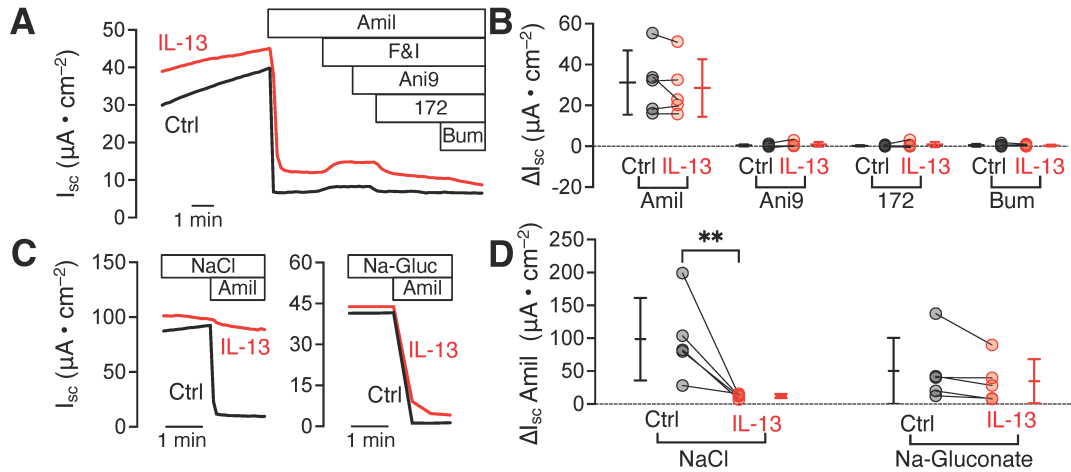

**SUPPLEMENTAL FIGURE 1. Increases in Anion Permeability with IL-13 Explain Much**

**of the Reduced Amiloride-sensitive  $I_{sc}$ .** (A) Short-circuit current ( $I_{sc}$ ) traces from CF human

airway epithelial cultures exposed to vehicle control or IL-13. (B) Summary  $I_{sc}$  values for CF donor epithelia treated with vehicle control or IL-13 for 3-4 weeks.  $n = 5$  donor epithelia per treatment group.

(C) Representative  $I_{sc}$  traces from vehicle control or IL-13 treated epithelia in  $\text{Cl}^-$ -containing or  $\text{Cl}^-$ -free bathing solutions and the  $I_{sc}$  response to amiloride ( $\Delta I_{sc}$  amiloride).

(D) Summary  $\Delta I_{sc}$  amiloride values. Error bars represent mean  $\pm$  SD.  $P$  values obtained from paired, two-sided Student's  $t$  test. Data points connected by a line represent paired experiments from a single human donor.

172, CFTR<sub>inh</sub>-172; Amil, amiloride; Bum, bumetanide; Ctrl, control; F&I, forskolin and 3-isobutyl-1-methylxanthine.

## SUPPLEMENTAL FIGURE 2

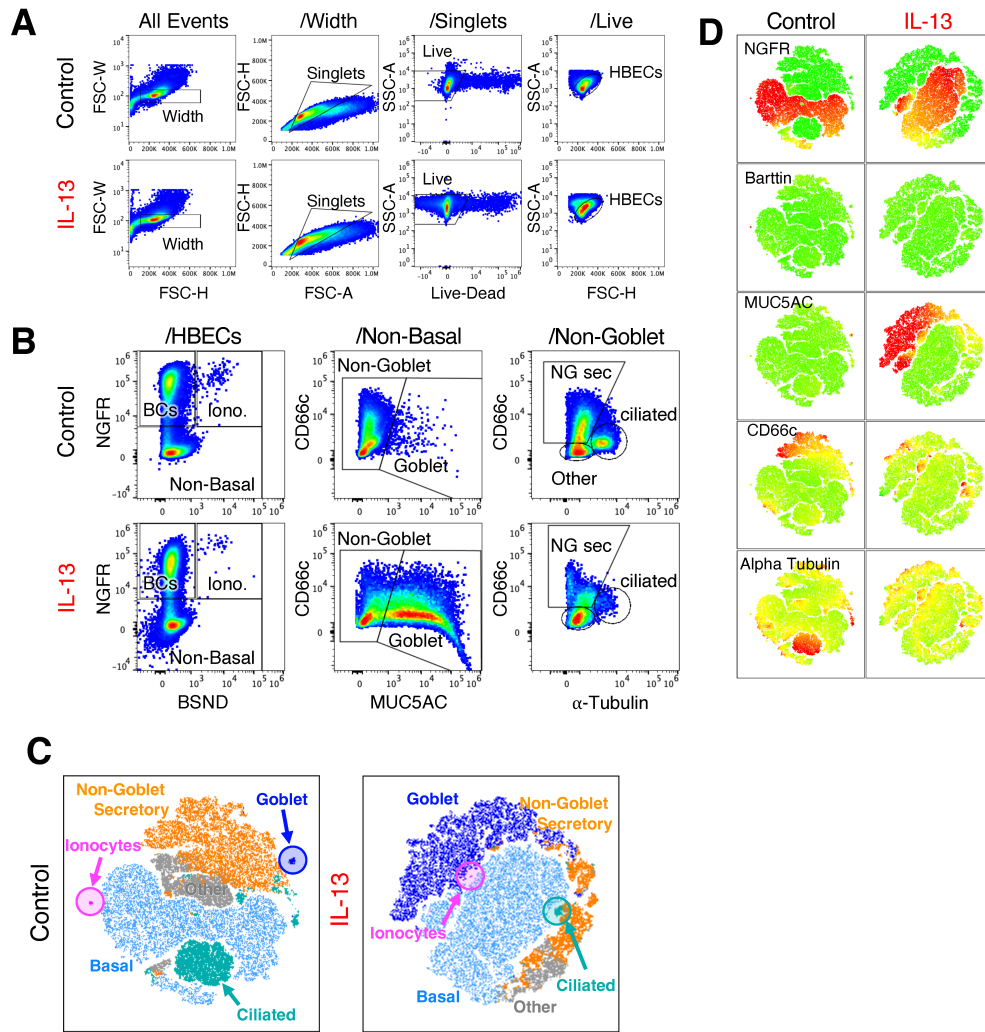

**SUPPLEMENTAL FIGURE 2. Flow Cytometry Analyses of Airway Epithelia.** (A) Gating scheme of epithelia treated with IL-13 or control. From left to right: all acquired events (/All Events) plotted by FSC-H and FSC-W, then by FSC-A and FSC-H to obtain single cells. Single cells (/Singlets) plotted by SSC-A versus Live/Dead Near-IR exclusion dye. Cells within the live gate (/Live) plotted for FSC-H and SSC-A to define human bronchial epithelial cell (HBECs) population. (B) Cells within the HBEC population (/HBECs) plotted by NGFR and BSND to identify basal cells (BCs), barttin-positive ionocytes (Iono.), and non-basal cells (non-basal). Cells within the non-basal cell gate (/Non-Basal) plotted for CD66c and MUC5AC to identify goblet cells and non-goblet cells. Cells within the non-goblet cell gate (/Non-Goblet) plotted for CD66c and  $\alpha$ -tubulin to identify secretory cells, ciliated cells, or uncharacterized cells. (C) Unbiased tSNE analysis of the cells within the HBEC gate pseudo-colored with the gates determined in (B), used to validate manual gating scheme. (D) Heat map of tSNE plot in (C) representing relative fluorescent intensity for a given marker. Green represents low fluorescent intensity. Red represents high fluorescent intensity. From top to bottom: NGFR, barttin, MUC5AC, CD66c, and  $\alpha$ -tubulin.

### SUPPLEMENTAL FIGURE 3

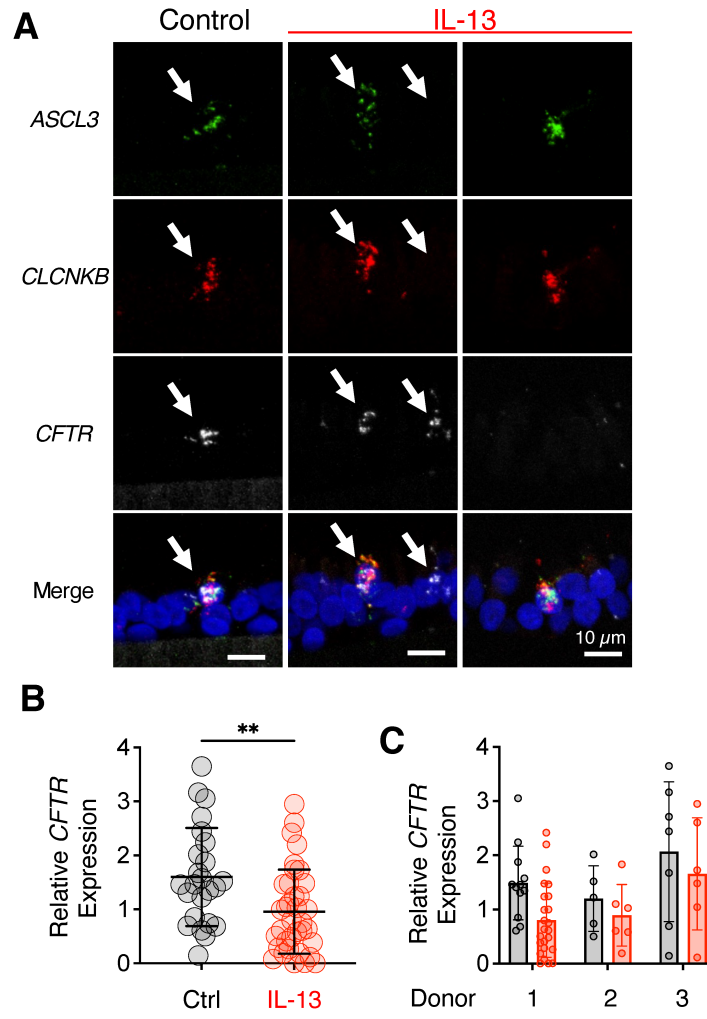

**SUPPLEMENTAL FIGURE 3. IL-13 Treatment Decreases *CFTR* expression in Ionocytes.**

(A) Fluorescent in-situ mRNA hybridization (FISH) of epithelial cultures exposed to IL-13 or vehicle control. Cells were probed for the ionocyte-associated transcription factor *ASCL3*, the barttin/Cl<sup>-</sup> channel encoding *CLCNKB*, and *CFTR*. (B) Relative *CFTR* expression calculated by normalizing the fluorescent intensity of *CFTR* to *ASCL3* intensity. Each symbol represents an individual ionocyte from 3 human donors. *P* value calculated from a two-tailed Student's *t* test. (C) Relative *CFTR* expression grouped by donor and treatment. Control (black) or IL-13 treated (red). Ctrl, control.

## SUPPLEMENTAL FIGURE 4

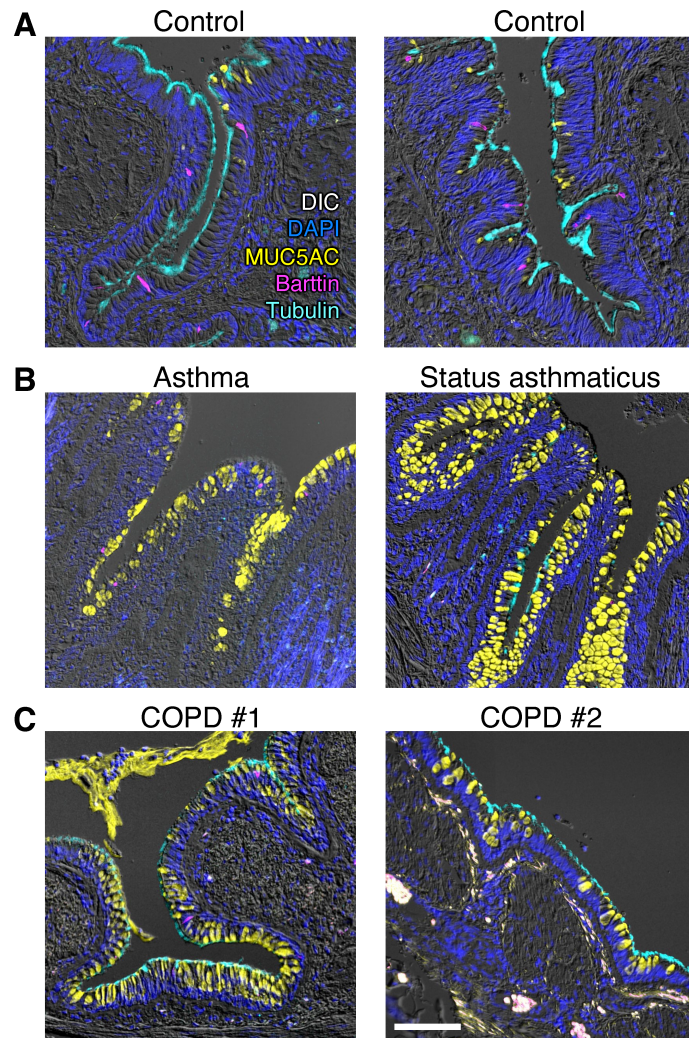

**SUPPLEMENTAL FIGURE 4. MUC5AC-Positive Goblet Cell Fluorescence in Human Tissues.** Immunofluorescence and imaging of serial lung sections for donor samples shown in Figure 7 and Supplemental Figure 5 for MUC5AC (yellow), tubulin (cyan), DAPI (blue), and barttin (magenta). Tissue morphology was captured by DIC microscopy. Tissues were obtained from (A) a control donor without airway disease, (B) a donor with asthma and another who succumbed to an asthma attack (status asthmaticus), and (C) two COPD donors. COPD, chronic obstructive pulmonary disease.

# SUPPLEMENTAL FIGURE 5

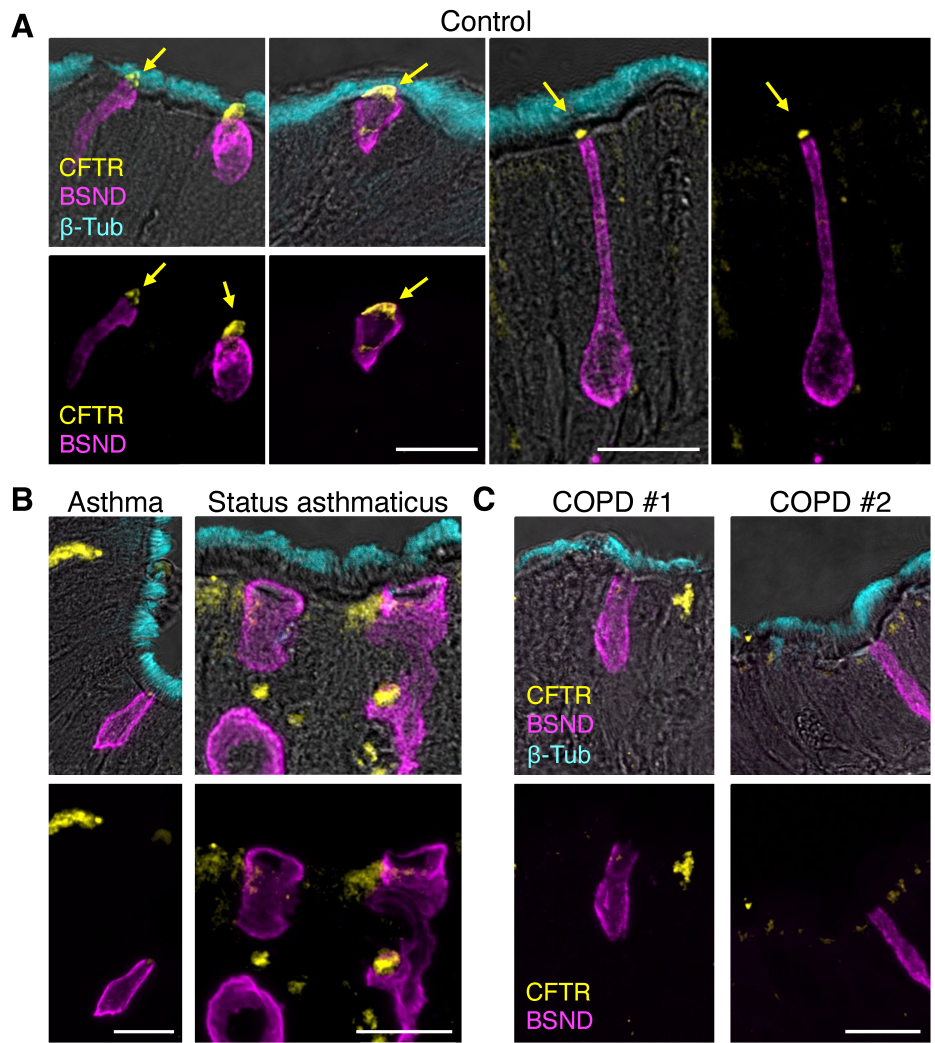



**SUPPLEMENTAL FIGURE 5. Ionocytes Lacking CFTR are Found in Human Airway Diseases Associated with Increased IL-13.** Lung histology sections from deceased human donors stained with CFTR (yellow), barttin (magenta, ionocytes), and  $\beta$ -tubulin (cyan, ciliated cells). Sections were obtained from (A) a control without known lung disease, (B) subjects with a history of asthma and status asthmaticus, and (C) subjects with COPD. Some images are also shown in Figure 7. Scale bar = 15  $\mu$ m. COPD, chronic obstructive pulmonary disease.

**SUPPLEMENTAL TABLE 1**

| <b>Target</b>      | <b>Clone</b> | <b>Vendor</b>                             | <b>Catalog number</b> |
|--------------------|--------------|-------------------------------------------|-----------------------|
| alpha-tubulin      | (DM1A)       | Novus Biologicals                         | NB100-690             |
| alpha-tubulin      | (D20G3)      | Cell Signaling                            | 5335S                 |
| BSND (barttin)     | (EPR14270)   | Abcam                                     | Ab196017              |
| beta-tubulin       | (TUB2.1)     | Sigma                                     | C4585-.2ML            |
| CEACAM6<br>(CD66c) | (KOR-SA3544) | Invitrogen/Thermo                         | 53-0667-42            |
| CFTR               | (769)        | UNC CFTR Antibody<br>Distribution Program |                       |
| MUC5AC             | (45M1)       | Novus                                     | NBP2-32732            |
| NGFR (CD271)       | (ME20.4)     | BioLegend                                 | 345110                |
| P63                | (epr5701)    | Abcam                                     | ab246728              |
